# Supplementary material for: 3D modeling and characterization of the human CD115 monoclonal antibody H27K15 epitope and design of a chimeric CD115 target
Source: PubMed Central journal article supplement — MAbs. 2014 Jan 6;6(2):533–46. doi: 10.4161/mabs.27736 (PMC3984341; doi:10.4161/mabs.27736), 2014-01-06

## **Supplemental Material to:**

**Benoît Grellier, Fabrice Le Pogam, Marc Vitorino,  
Jean-Philippe Starck, Michel Geist, Vanessa  
Duong, H el ene Haegel, Thierry Menguy, Jean-  
Yves Bonnefoy, Jean-Baptiste Marchand, and  
Philippe Ancian**

**3D modeling and characterization of the human CD115  
monoclonal antibody H27K15 epitope and design of a  
chimeric CD115 target**

**2013; mAbs 6(2)**

**<http://dx.doi.org/10.4161/mabs.27736>**

**<https://www.landesbioscience.com/journals/mabs/article/27736/>**

## Supplemental Legends

**Supplementary Figure 1.** Docking results between hCD115<sub>D1-D3</sub> crystal structure and H27K15 4m model. **A:** localization of the 54,000 poses assessed for docking analysis. The C-terminal region of the CD115 D3 domain was excluded from the analysis. **B:** the average density colored surface was calculated with Discovery Studio from the best 2,000 ZRANK poses. The top 200 poses used for spatial clustering are shown as small spheres; centers from the 5 clusters with the highest density of poses are shown as large spheres (C1 to C5); domain excluded from analysis is indicated in gray. Small panels, reverse views. Views were generated with Discovery Studio v3.5.

**Supplementary Figure 2.** Predicted epitope surface of H27K15 after docking on hCD115 model. D1/D2 delimitation is drawn in dotted line. Interacting residues of hCD115 are indicated, colored by amino acids. Panel **A**, 4m epitope; Panel **B**, 14m epitope.

**Supplementary Figure 3.** Structural alignment of hCD115 model and crystal. **A**, sequence alignment; the gap illustrates the unresolved loop in the crystal. **B**, structural alignment of D1-D2 main chains. RMSD refers to D1-D2 only.

**Supplementary Figure 4.** H27K15/hCD115 interface according to **(A)** polar and **(B)** Van der Waals interactions. Grey, D1 domain; orange, D2 domain; blue, polar interacting residues; green, residues involved in Van der Waals interactions; yellow, light chain; red, heavy chain.

**Supplementary Figure 5.** Quartz Crystal Microbalance association and dissociation profiles of the mouse ligands mCSF-1 (**A**) or mIL-34 (**B**) with the immobilized chimeric CD115<sub>D1-D5</sub> constructs 1/3 D1, 2/3D1 and hD1. Raw data (black); model fitting (red). Kinetics parameters deduced from these curves are reported in Table IV.

A

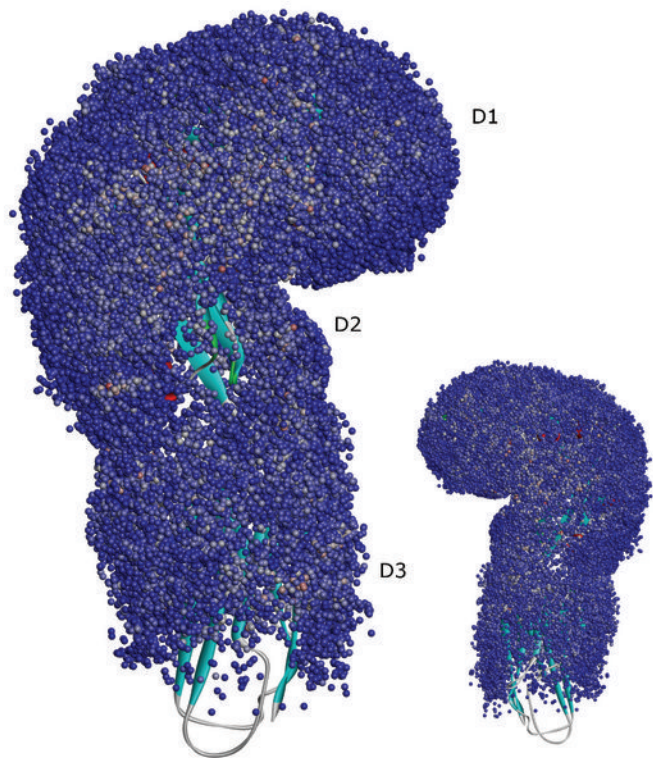

B

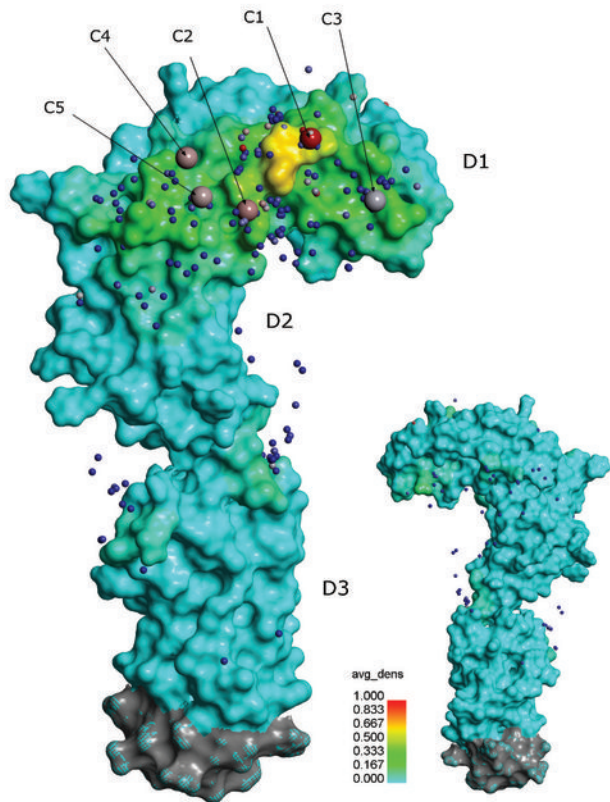

A

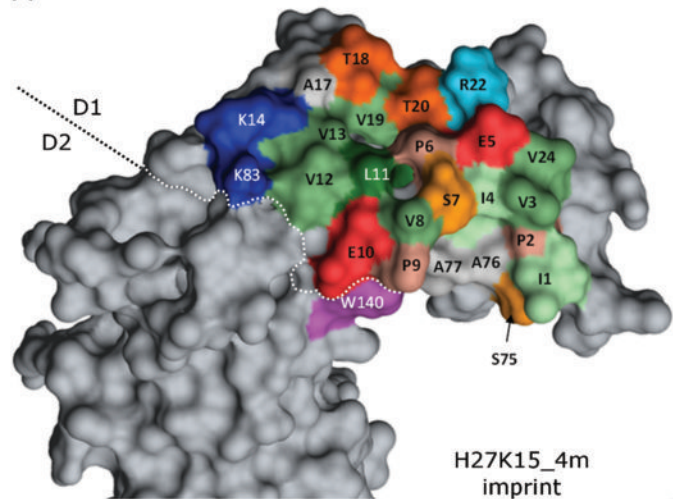

B

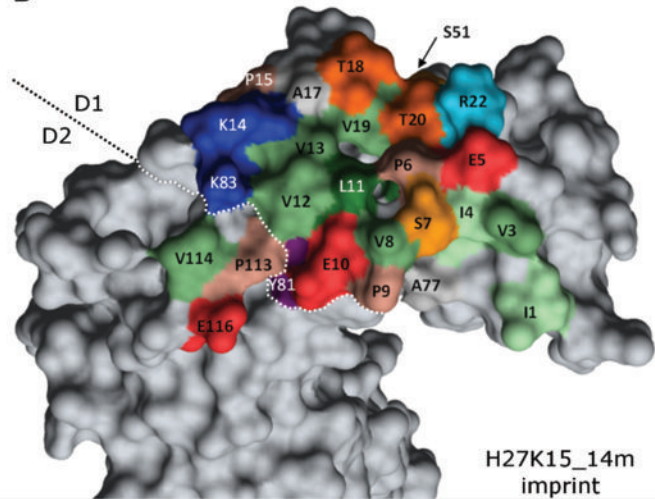

A

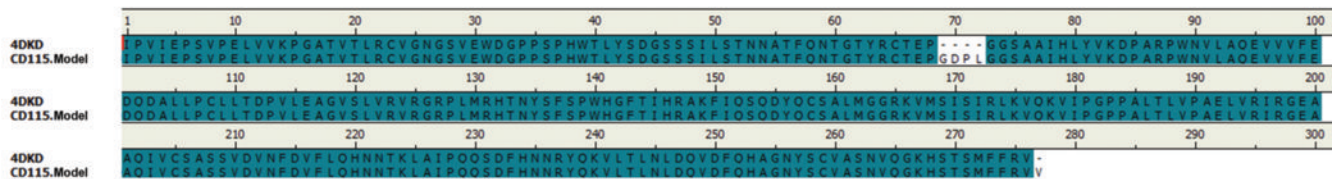

B

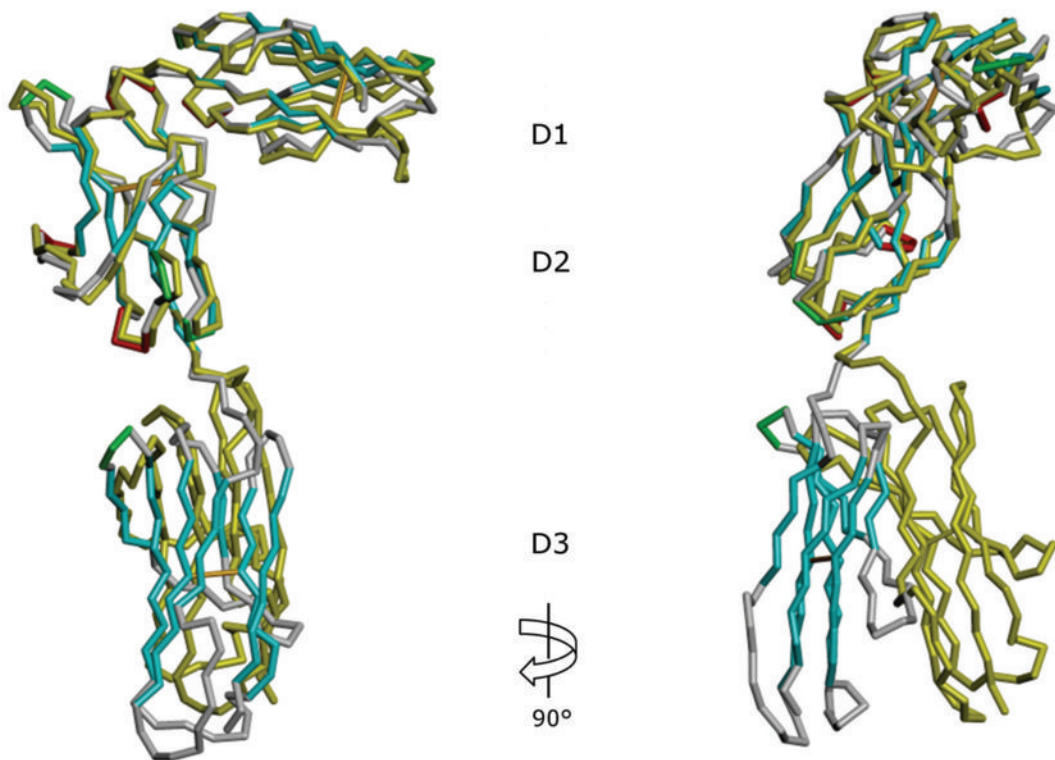

RMSD = 1.42 Å

**A**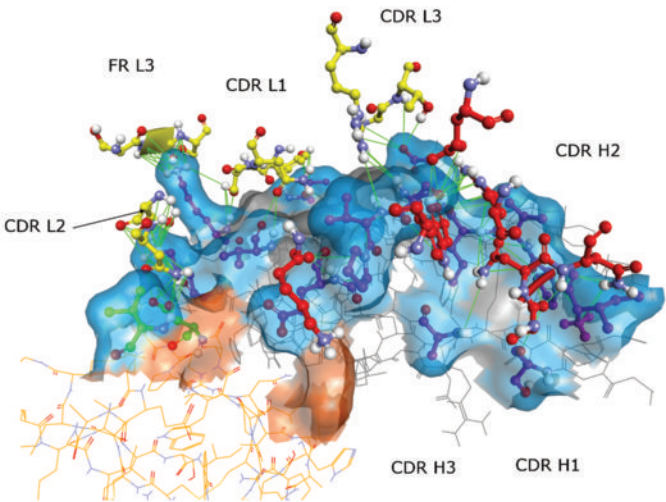**B**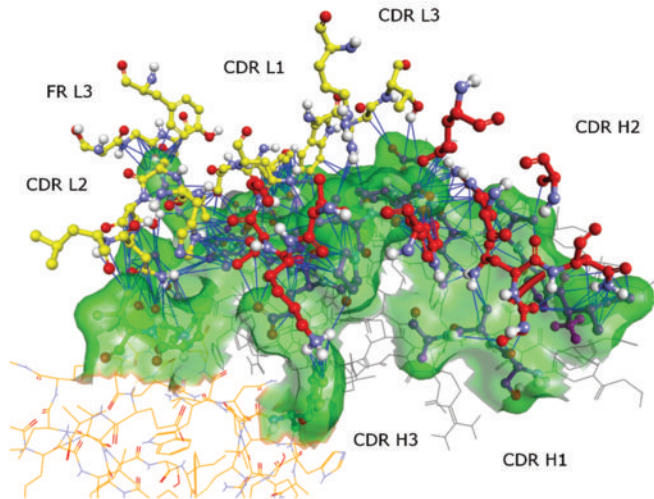

A

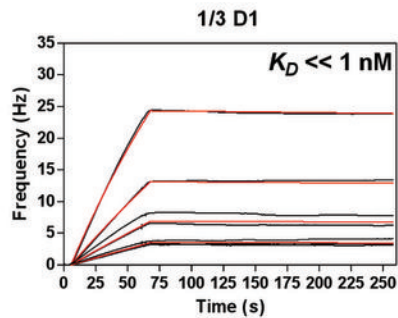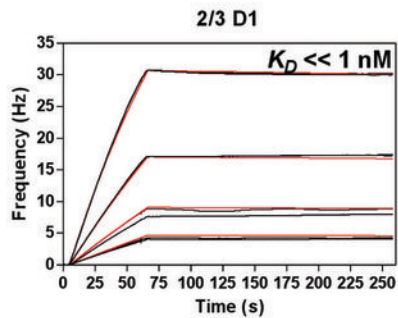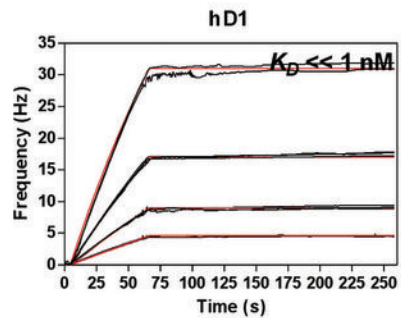

B

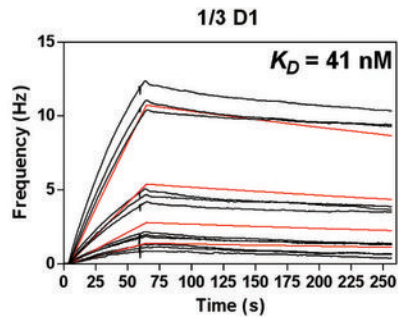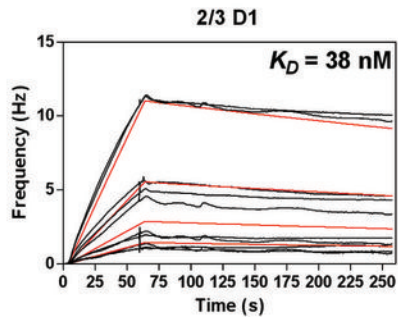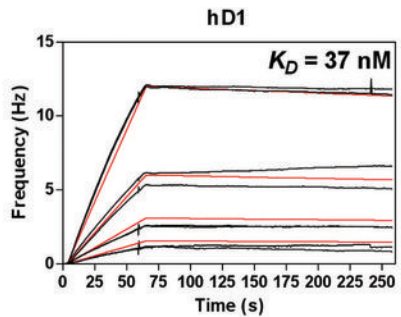

Supplement: mabs-6-533-s01.pdf [file mabs-6-533-s01.pdf]
